# Supplementary material for: Interferon-β Activity Is Affected by S100B Protein
Source: MDPI journal article supplement (doi:10.3390/ijms23041997), 2022-02-11
Supplement: s1 [file s1]

# Interferon Beta Activity Is Affected by S100B Protein

Alexey S. Kazakov <sup>1</sup>, Alexander D. Sofin <sup>1</sup>, Nadezhda V. Avkhacheva <sup>1</sup>, Evgenia I. Deryusheva <sup>1</sup>, Victoria A. Rastrygina <sup>1</sup>, Maria E. Permyakova <sup>1</sup>, Vladimir N. Uversky <sup>2,\*</sup>, Eugene A. Permyakov <sup>1</sup> and Sergei E. Permyakov <sup>1,\*</sup>

<sup>1</sup> Institute for Biological Instrumentation, Pushchino Scientific Center for Biological Research of the Russian Academy of Sciences, Institutskaya str., 7, Pushchino, Moscow Region 142290, Russia; fenixfly@yandex.ru (A.S.K.); AlSofin@mail.ru (A.D.S.); avkhacheva@gmail.com (N.V.A.); janed1986@ya.ru (); certusfides@gmail.com (V.A.R.); mperm1977@gmail.com (M.E.P.); epermyak@yandex.ru (E.A.P.); permyakov.s@gmail.com (S.E.P.)

<sup>2</sup> Department of Molecular Medicine and USF Health Byrd Alzheimer's Research Institute, Morsani College of Medicine, University of South Florida, Tampa, FL 33612, USA

\* Correspondence: vuversky@usf.edu (V.N.U.); permyakov.s@gmail.com (S.E.P.); Tel.: +7-(495)-143-7741 (S.E.P.); Fax: +7-(4967)-33-05-22 (S.E.P.)

**Table S1.** List of the human diseases associated with IFN- $\beta$  and S100B protein, according to DisGeNET database (<http://www.disgenet.org>). PubMed identifiers of the references confirming the protein-disease associations are indicated.

| №  | Disease                               | IFN- $\beta$                                                                                                                                                                                                                                             | S100B                                                                                                                                                                                                                       |
|----|---------------------------------------|----------------------------------------------------------------------------------------------------------------------------------------------------------------------------------------------------------------------------------------------------------|-----------------------------------------------------------------------------------------------------------------------------------------------------------------------------------------------------------------------------|
| 1  | Glioblastoma                          | 29557060; 27637889; 28098415; 29159280; 28912136; 27194146; 25920530; 26441059; 26397698; 24526161; 23384727; 21805051; 20606645; 19197327; 15455376; 14965379; 1501894; 1998958; 1653364                                                                | 21714070; 18577219                                                                                                                                                                                                          |
| 2  | Cutaneous Melanoma                    | 29136453                                                                                                                                                                                                                                                 | 21654685; 8225871                                                                                                                                                                                                           |
| 3  | Malignant neoplasm of urinary bladder | 11948141; 2297754                                                                                                                                                                                                                                        | 17970044                                                                                                                                                                                                                    |
| 4  | Secondary malignant neoplasm of liver | 28008721; 21958207; 14977858; 12405292; 11435460                                                                                                                                                                                                         | 29387968; 22011044                                                                                                                                                                                                          |
| 5  | Atrial Fibrillation                   | 26056004                                                                                                                                                                                                                                                 | 31118294; 31575426                                                                                                                                                                                                          |
| 6  | Lupus Erythematosus, Discoid          | 29466691                                                                                                                                                                                                                                                 | 31271591                                                                                                                                                                                                                    |
| 7  | Dermatomyositis                       | 30101523; 27564228; 23018857; 21177291; 21670437; 17968926                                                                                                                                                                                               | 30157932                                                                                                                                                                                                                    |
| 8  | Ischemic stroke                       | 31810024; 31100209; 30320448; 12973019                                                                                                                                                                                                                   | 29384222; 29343763; 28598212                                                                                                                                                                                                |
| 9  | Colon Carcinoma                       | 31348591; 29496994; 18035482; 1586975                                                                                                                                                                                                                    | 31266264                                                                                                                                                                                                                    |
| 10 | Primary malignant neoplasm            | 30864696; 30613977; 31167402; 31348591; 30679806; 31036052; 30446226; 29750542; 29158470; 27637889; 29229854; 28214639; 28912136; 28129467; 26597133; 27077807; 26880763; 27496321; 27532609; 24141111; 23403306; 22522623; 22842821; 21226949; 22106296 | 30710273; 31266264; 29345293                                                                                                                                                                                                |
| 11 | Seizures                              | 12432978                                                                                                                                                                                                                                                 | 30173303; 17955279                                                                                                                                                                                                          |
| 12 | Schizophrenia                         | 26133963                                                                                                                                                                                                                                                 | 31786729; 30144068; 30618856; 28435992; 29164477; 29875007; 27863321; 22019077; 22146151; 22146151; 21112154; 21714070; 21070816; 21070816; 20398908; 20398908; 19103440; 20093730; 17982903; 17525977; 17043297; 17062375; |

|    |                               |                                                                                                                                                                                  |                                                                                                  |
|----|-------------------------------|----------------------------------------------------------------------------------------------------------------------------------------------------------------------------------|--------------------------------------------------------------------------------------------------|
|    |                               |                                                                                                                                                                                  | 15670788; 15670788                                                                               |
| 13 | Non-Small Cell Lung Carcinoma | 30622322; 26431376; 23658645                                                                                                                                                     | 30455129; 22286962; 19118029                                                                     |
| 14 | Glioma                        | 31638255; 31100209; 26252165; 25175315; 24671169; 24526161; 22938469; 21805051; 19893595; 18220319; 16343929; 14965379; 15546502; 11856487; 10982152; 10395172; 9875676; 1998958 | 30076898; 8750867                                                                                |
| 15 | Coronary heart disease        | 25882064                                                                                                                                                                         | 29183208; 30966831; 28672919                                                                     |
| 16 | Memory impairment             | 31152860                                                                                                                                                                         | 31202867; 30590973; 11222062                                                                     |
| 17 | Breast Carcinoma              | 31167402; 27207649; 27077807; 26716512; 25884794; 24141111; 18608205; 18608205; 9059994                                                                                          | 29345293; 20145129                                                                               |
| 18 | Brain Neoplasms               | 23384727; 21805051; 19197327; 1501894                                                                                                                                            | 30455129                                                                                         |
| 19 | Cerebrovascular accident      | 30320448; 12973019                                                                                                                                                               | 31387626; 30144068; 31356182; 30229393; 29792379; 29249591; 16960091                             |
| 20 | Cone-Rod Dystrophy 2          | 17125797                                                                                                                                                                         | 29959890                                                                                         |
| 21 | Carcinoma of lung             | 30622322; 31428903; 30683475; 30446226; 26351076; 25486572; 19893592; 19564073; 2560625                                                                                          | 21861268                                                                                         |
| 22 | Septicemia                    | 30770245; 31500303; 29741098; 30319651; 28533774                                                                                                                                 | 27436624                                                                                         |
| 23 | Depressed mood                | 28497489; 28245725; 29055445; 28500224                                                                                                                                           | 30745657; 31100426; 30506371; 31493698; 30278520; 28594820; 19497163; 16797859; 8804639; 8840925 |
| 24 | Sepsis                        | 30770245; 31500303; 29741098; 30319651; 28533774                                                                                                                                 | 27436624                                                                                         |
| 25 | nervous system disorder       | 27613121                                                                                                                                                                         | 31067852; 29329729                                                                               |
| 26 | Neoplasm Metastasis           | 31070806; 30213181; 29202279; 28129467; 26716512; 26102027; 20197756; 12405292; 11948141; 11498771; 10029078; 9815626                                                            | 31278360; 29345293; 17264538                                                                     |
| 27 | Malignant neoplasm of lung    | 30683475; 30622322; 30446226; 26351076; 25486572; 19893592; 19564073; 2560625                                                                                                    | 21861268                                                                                         |
| 28 | Malignant neoplasm of breast  | 31167402; 26716512; 27077807; 25884794; 24141111; 18608205;                                                                                                                      | 29345293; 20145129                                                                               |

|    |                                             |                                                                                                                                                                                                                                                                                  |                                                                                                                                                       |
|----|---------------------------------------------|----------------------------------------------------------------------------------------------------------------------------------------------------------------------------------------------------------------------------------------------------------------------------------|-------------------------------------------------------------------------------------------------------------------------------------------------------|
|    |                                             | 18608205                                                                                                                                                                                                                                                                         |                                                                                                                                                       |
| 29 | Polymyositis                                | 21670437; 17968926                                                                                                                                                                                                                                                               | 30157932                                                                                                                                              |
| 30 | Neuroblastoma                               | 27637889; 26887385; 28882441;<br>26943965; 25920530; 25086905;<br>18726131; 16115947                                                                                                                                                                                             | 21714070; 19216736; 9458088;<br>8733171                                                                                                               |
| 31 | Brain Diseases                              | 12618863; 8615598                                                                                                                                                                                                                                                                | 31009650; 21112154;<br>18454941; 18454941; 17705023                                                                                                   |
| 32 | estrogen receptor-negative<br>breast cancer | 8669823                                                                                                                                                                                                                                                                          | 29345293                                                                                                                                              |
| 33 | Status Epilepticus                          | 28166388                                                                                                                                                                                                                                                                         | 29506554; 29680360; 28444637                                                                                                                          |
| 34 | Lupus Erythematosus                         | 29466691                                                                                                                                                                                                                                                                         | 31271591                                                                                                                                              |
| 35 | melanoma                                    | 31356866; 30864696; 30213181;<br>31070806; 28649738; 27677689;<br>28624449; 28877249; 29136453;<br>27399807; 26102027; 26054674;<br>25728676; 23370279; 23358428;<br>23018621; 22555508; 21723255;<br>21846298; 21493591; 18945721;<br>16505900; 16928243; 16343929;<br>12096926 | 29135116; 30710305;<br>29849947; 29345293;<br>28212812; 27633490;<br>26659191; 26288839;<br>24627490; 24490776; 23375094                              |
| 36 | Neuromyelitis Optica                        | 31136907; 28600575; 23434493;<br>17125797                                                                                                                                                                                                                                        | 30426010; 19372295                                                                                                                                    |
| 37 | Tumor Cell Invasion                         | 29618645; 28317173; 25486572                                                                                                                                                                                                                                                     | 31266264; 28849099;<br>22286962; 21861268                                                                                                             |
| 38 | Depressive disorder                         | 28497489; 28500224; 28245725;<br>29055445                                                                                                                                                                                                                                        | 30745657; 31100426;<br>30506371; 31493698;<br>30278520; 28594820;<br>19497163; 19497163;<br>16797859; 16797859; 8804639;<br>8840925; 8804639; 8840925 |
| 39 | Stomach Carcinoma                           | 22159640                                                                                                                                                                                                                                                                         | 25266115                                                                                                                                              |
| 40 | Mental Depression                           | 28497489; 29055445; 28500224;<br>28245725                                                                                                                                                                                                                                        | 30745657; 30506371;<br>31493698; 31100426;<br>30278520; 28594820;<br>16797859; 16797859; 8804639;<br>8840925; 8804639; 8840925                        |
| 41 | Impaired cognition                          | 31233762; 31152860; 29063244;<br>21208197                                                                                                                                                                                                                                        | 31683478; 31402961;<br>29957487; 29523900;<br>27641367; 27863321;<br>17579612; 11222062                                                               |
| 42 | Mental deterioration                        | 21208197                                                                                                                                                                                                                                                                         | 17579612                                                                                                                                              |
| 43 | Forgetful                                   | 31152860                                                                                                                                                                                                                                                                         | 30590973; 11222062                                                                                                                                    |

|    |                                                             |                                                                                                                                                                                                                                                                                  |                                                                                                                |
|----|-------------------------------------------------------------|----------------------------------------------------------------------------------------------------------------------------------------------------------------------------------------------------------------------------------------------------------------------------------|----------------------------------------------------------------------------------------------------------------|
| 44 | Adult type dermatomyositis                                  | 30101523; 27564228; 23018857;<br>21177291; 21670437                                                                                                                                                                                                                              | 30157932                                                                                                       |
| 45 | Psoriasis                                                   | 27438769                                                                                                                                                                                                                                                                         | 29186242; 17719207                                                                                             |
| 46 | Lupus Vulgaris                                              | 29466691                                                                                                                                                                                                                                                                         | 31271591                                                                                                       |
| 47 | Human immunodeficiency virus (HIV) II infection category B1 | 28009639; 10954903; 10446920                                                                                                                                                                                                                                                     | 28852071                                                                                                       |
| 48 | Secondary Neoplasm                                          | 20197756                                                                                                                                                                                                                                                                         | 31278360                                                                                                       |
| 49 | Degenerative polyarthritis                                  | 23369825                                                                                                                                                                                                                                                                         | 31100426; 30280200                                                                                             |
| 50 | leukemia                                                    | 2295067                                                                                                                                                                                                                                                                          | 8677743                                                                                                        |
| 51 | Vitiligo                                                    | 28752785                                                                                                                                                                                                                                                                         | 28647026; 28212812                                                                                             |
| 52 | Leukemia, T-Cell                                            | 28768861                                                                                                                                                                                                                                                                         | 8381310; 2896028                                                                                               |
| 53 | Childhood Astrocytoma                                       | 19267105; 8103050; 1906070                                                                                                                                                                                                                                                       | 19147496                                                                                                       |
| 54 | Astrocytoma                                                 | 19267105; 15455376; 8174086;<br>8103050; 1906070                                                                                                                                                                                                                                 | 19147496; 2186177                                                                                              |
| 55 | Lupus Erythematosus, Systemic                               | 31153744; 29466691; 30201809;<br>28471483; 24561305; 24644022;<br>22859983; 17968925                                                                                                                                                                                             | 31271591; 30392117;<br>30376438; 30282561; 17955279                                                            |
| 56 | Primary malignant neoplasm of lung                          | 30683475; 30622322; 30446226;<br>26351076; 25486572; 19893592;<br>19564073; 2560625                                                                                                                                                                                              | 21861268                                                                                                       |
| 57 | Malignant Neoplasms                                         | 30864696; 30679806; 31348591;<br>31036052; 31167402; 30613977;<br>30446226; 29158470; 29750542;<br>28214639; 26597133; 29229854;<br>28912136; 28129467; 27637889;<br>27532609; 26880763; 27496321;<br>27077807; 24141111; 23403306;<br>22522623; 22842821; 22106296;<br>21226949 | 30732223; 30710281;<br>31266264; 29345293;<br>30366122; 29987748;<br>28051137; 25614008;<br>19351828; 18705642 |
| 58 | Adult Glioblastoma                                          | 29557060; 28098415; 29159280;<br>27637889; 27194146; 26441059;<br>25920530; 24526161; 19197327;<br>1998958                                                                                                                                                                       | 21714070                                                                                                       |
| 59 | Virus Diseases                                              | 31495880; 30275539; 31461630;<br>31500303; 29979632; 31379819;<br>31043529; 31594636; 30522781;<br>31603951; 30930359; 31154625;<br>30995506; 29559569; 29046453;<br>30089112; 30333836; 30298349;<br>30569290; 29611236; 28589097;<br>29258190; 28573616; 27983470;<br>29138248 | 29953169                                                                                                       |

|    |                                                                            |                                                                                                                                                                                                                                                          |                                                                                                                                                                                                                                      |
|----|----------------------------------------------------------------------------|----------------------------------------------------------------------------------------------------------------------------------------------------------------------------------------------------------------------------------------------------------|--------------------------------------------------------------------------------------------------------------------------------------------------------------------------------------------------------------------------------------|
| 60 | VITILIGO-ASSOCIATED MULTIPLE AUTOIMMUNE DISEASE SUSCEPTIBILITY 1 (finding) | 28752785                                                                                                                                                                                                                                                 | 28647026; 28212812                                                                                                                                                                                                                   |
| 61 | Diabetes Mellitus, Insulin-Dependent                                       | 16504056                                                                                                                                                                                                                                                 | 31067852; 29484801                                                                                                                                                                                                                   |
| 62 | Inflammatory Bowel Diseases                                                | 27220814                                                                                                                                                                                                                                                 | 30144068; 19558426                                                                                                                                                                                                                   |
| 63 | Obesity                                                                    | 29914624; 22951153                                                                                                                                                                                                                                       | 31363816; 28174179                                                                                                                                                                                                                   |
| 64 | Seizures, Focal                                                            | 12432978                                                                                                                                                                                                                                                 | 30173303                                                                                                                                                                                                                             |
| 65 | Coronary Artery Disease                                                    | 25882064                                                                                                                                                                                                                                                 | 30783474                                                                                                                                                                                                                             |
| 66 | Glioblastoma Multiforme                                                    | 29557060; 29159280; 28912136; 28098415; 27637889; 27194146; 25920530; 26441059; 24526161; 23384727; 20606645; 19197327; 18714312; 14965379; 1653364; 1998958                                                                                             | 21714070; 18577219                                                                                                                                                                                                                   |
| 67 | Multiple Sclerosis                                                         | 30610426; 31467033; 31732227; 31606972; 31649263; 31793659; 31522451; 30401571; 30763907; 30684504; 29440323; 30289355; 31209101; 30592627; 30692524; 31589278; 31331574; 31202258; 31517556; 31235738; 30917079; 31565644; 30315270; 31354720; 30594597 | 30368653; 30319357; 19372295; 12355425                                                                                                                                                                                               |
| 68 | Childhood Neuroblastoma                                                    | 26887385; 28882441; 27637889; 26943965; 25920530; 25086905; 18726131                                                                                                                                                                                     | 21714070; 19216736; 9458088; 8733171                                                                                                                                                                                                 |
| 69 | Amyloidosis                                                                | 30222725                                                                                                                                                                                                                                                 | 29259249; 24586351; 19705461; 16709678                                                                                                                                                                                               |
| 70 | Encephalitis, St. Louis                                                    | 31153744                                                                                                                                                                                                                                                 | 30376438                                                                                                                                                                                                                             |
| 71 | Meningioma                                                                 | 27873050                                                                                                                                                                                                                                                 | 17020600; 15492810                                                                                                                                                                                                                   |
| 72 | Alzheimer's Disease                                                        | 30610591; 31152860; 31233762; 30076830; 30222725; 24262201                                                                                                                                                                                               | 31683478; 30649628; 30144068; 31217937; 31281238; 29963623; 29681765; 30045751; 28582866; 29386995; 27585561; 20953641; 21080947; 19705461; 19205880; 16797859; 15290893; 15126113; 12505619; 11754997; 11222062; 10617132; 10381557 |

|    |                                            |                                                                                                                                                                                                                                                          |                                        |
|----|--------------------------------------------|----------------------------------------------------------------------------------------------------------------------------------------------------------------------------------------------------------------------------------------------------------|----------------------------------------|
| 73 | Bacterial Infections                       | 29190678; 28422568; 28461567                                                                                                                                                                                                                             | 28815036                               |
| 74 | Adult T-Cell Lymphoma/Leukemia             | 28768861                                                                                                                                                                                                                                                 | 8381310                                |
| 75 | Central neuroblastoma                      | 27637889; 26887385; 28882441; 26943965; 25920530; 25086905; 18726131                                                                                                                                                                                     | 21714070; 19216736; 9458088; 8733171   |
| 76 | Metastatic melanoma                        | 21235385; 10942517                                                                                                                                                                                                                                       | 31704599; 29792379; 25586991; 16179868 |
| 77 | Pain                                       | 29394383                                                                                                                                                                                                                                                 | 31824318                               |
| 78 | Infection                                  | 19201909; 16984921; 16002711; 15280450; 15163721                                                                                                                                                                                                         | 17624933                               |
| 79 | Secondary malignant neoplasm of lymph node | 30672717; 23358428                                                                                                                                                                                                                                       | 23519055                               |
| 80 | Malignant Pleural Mesothelioma             | 19715403; 17671130                                                                                                                                                                                                                                       | 28377727                               |
| 81 | Purpura, Thrombotic Thrombocytopenic       | 28791286                                                                                                                                                                                                                                                 | 29572925                               |
| 82 | Malignant neoplasm of stomach              | 22159640                                                                                                                                                                                                                                                 | 25266115                               |
| 83 | Childhood Glioblastoma                     | 29557060; 28098415; 29159280; 27637889; 27194146; 26441059; 25920530; 24526161; 19197327; 1998958                                                                                                                                                        | 21714070                               |
| 84 | Neoplasms                                  | 31512776; 31776268; 30683475; 31070806; 31627888; 30848981; 31036052; 30393160; 31358054; 31431457; 30675668; 30679806; 30622322; 29750542; 30012853; 29849115; 28912136; 28337378; 28514874; 27188205; 28578991; 28098415; 28483787; 27399807; 26880763 | 31704599; 29135116; 30076898; 29519923 |
| 85 | Hepatitis                                  | 30594597; 22106296                                                                                                                                                                                                                                       | 18173564                               |
| 86 | Malignant neoplasm of ovary                | 11896621                                                                                                                                                                                                                                                 | 31033462; 30558666; 29345293           |
| 87 | Tumor Progression                          | 31821828; 28849002                                                                                                                                                                                                                                       | 20587415                               |
| 88 | Optic Atrophy                              | 21987543                                                                                                                                                                                                                                                 | 29959432                               |

**Table S2.** List of the human diseases associated with IFN- $\beta$  and S100B protein, according to Open Targets Platform database (<https://www.opentargets.org>), and corresponding association scores (<https://docs.targetvalidation.org/getting-started/scoring>). Diseases with association scores for the both proteins exceeding 0.1 are highlighted in yellow.

| №  | Disease                            | IFN- $\beta$ | S100B |
|----|------------------------------------|--------------|-------|
| 1  | cutaneous melanoma                 | 0.038        | 0.367 |
| 2  | brain neoplasm                     | 0.788        | 0.168 |
| 3  | Ischemic stroke                    | 0.015        | 0.069 |
| 4  | ischemia                           | 0.053        | 0.089 |
| 5  | infectious meningitis              | 0.021        | 0.059 |
| 6  | dilated cardiomyopathy             | 0.256        | 0.059 |
| 7  | HIV-1 infection                    | 0.042        | 0.103 |
| 8  | brain injury                       | 0.046        | 0.081 |
| 9  | X-linked adrenoleukodystrophy      | 0.046        | 0.033 |
| 10 | non-small cell lung carcinoma      | 0.646        | 0.076 |
| 11 | colorectal carcinoma               | 0.063        | 0.1   |
| 12 | idiopathic pulmonary fibrosis      | 0.031        | 0.013 |
| 13 | hyperplasia                        | 0.05         | 0.027 |
| 14 | HIV infection                      | 0.058        | 0.107 |
| 15 | esophageal squamous cell carcinoma | 0.04         | 0.017 |
| 16 | colon carcinoma                    | 0.06         | 0.095 |
| 17 | Chronic mucocutaneous candidosis   | 0.021        | 0.015 |
| 18 | amyotrophic lateral sclerosis      | 0.036        | 0.16  |
| 19 | ulcer disease                      | 0.063        | 0.036 |
| 20 | unipolar depression                | 0.083        | 0.099 |
| 21 | viral disease                      | 0.225        | 0.122 |
| 22 | Sleep Disorder                     | 0.025        | 0.058 |
| 23 | intoxication                       | 0.01         | 0.074 |
| 24 | Porphyria cutanea tarda            | 0.04         | 0.138 |
| 25 | Parkinson's disease                | 0.041        | 0.067 |
| 26 | kidney failure                     | 0.016        | 0.044 |
| 27 | paraneoplastic neurologic syndrome | 0.01         | 0.008 |



|    |                                           |       |       |
|----|-------------------------------------------|-------|-------|
| 28 | Weight loss                               | 0.022 | 0.02  |
| 29 | colorectal adenocarcinoma                 | 0.044 | 0.067 |
| 30 | complication                              | 0.078 | 0.069 |
| 31 | psychosis                                 | 0.013 | 0.17  |
| 32 | pneumonia                                 | 0.049 | 0.017 |
| 33 | influenza                                 | 0.191 | 0.015 |
| 34 | Charcot-Marie-Tooth disease type 1A       | 0.198 | 0.022 |
| 35 | wet macular degeneration                  | 0.046 | 0.01  |
| 36 | adverse effect                            | 0.077 | 0.013 |
| 37 | arterial occlusion                        | 0.025 | 0.044 |
| 38 | fibrosis                                  | 0.055 | 0.018 |
| 39 | glioma                                    | 0.788 | 0.168 |
| 40 | neurofibroma                              | 0.006 | 0.054 |
| 41 | Coma                                      | 0.012 | 0.028 |
| 42 | optic neuritis                            | 0.044 | 0.012 |
| 43 | stroke                                    | 0.13  | 0.121 |
| 44 | hypertension                              | 0.076 | 0.144 |
| 45 | invasive breast ductal carcinoma          | 0.009 | 0.043 |
| 46 | peripheral neuropathy                     | 0.346 | 0.19  |
| 47 | asphyxia                                  | 0.004 | 0.04  |
| 48 | multiple sclerosis                        | 0.119 | 0.064 |
| 49 | small cell lung carcinoma                 | 0.033 | 0.051 |
| 50 | meningoencephalitis                       | 0.012 | 0.01  |
| 51 | epilepsy                                  | 0.308 | 0.081 |
| 52 | myositis                                  | 0.076 | 0.032 |
| 53 | melanoma                                  | 0.188 | 0.382 |
| 54 | paraplegia                                | 0.255 | 0.016 |
| 55 | atherosclerosis                           | 0.052 | 0.018 |
| 56 | type II hypersensitivity reaction disease | 0.258 | 0.101 |
| 57 | exhaustion                                | 0.016 | 0.031 |
| 58 | psoriasis vulgaris                        | 0.011 | 0.015 |

|    |                                        |       |       |
|----|----------------------------------------|-------|-------|
| 59 | pulmonary arterial hypertension        | 0.075 | 0.031 |
| 60 | neuropathic pain                       | 0.013 | 0.014 |
| 61 | Neurodegeneration                      | 0.048 | 0.055 |
| 62 | Headache                               | 0.073 | 0.041 |
| 63 | Proteinuria                            | 0.065 | 0.037 |
| 64 | memory impairment                      | 0.022 | 0.03  |
| 65 | amyloidosis                            | 0.013 | 0.074 |
| 66 | Sepsis                                 | 0.081 | 0.057 |
| 67 | Fever                                  | 0.065 | 0.031 |
| 68 | animal viral hepatitis                 | 0.019 | 0.026 |
| 69 | Brain atrophy                          | 0.036 | 0.028 |
| 70 | ischemia reperfusion injury            | 0.023 | 0.032 |
| 71 | glioblastoma multiforme                | 0.676 | 0.032 |
| 72 | head and neck squamous cell carcinoma  | 0.054 | 0.5   |
| 73 | primary progressive multiple sclerosis | 0.056 | 0.045 |
| 74 | skin neoplasm                          | 0.188 | 0.615 |
| 75 | dizziness                              | 0.012 | 0.004 |
| 76 | squamous cell carcinoma                | 0.056 | 0.505 |
| 77 | mucous membrane pemphigoid             | 0.04  | 0.01  |
| 78 | neurodegenerative disease              | 0.354 | 0.172 |
| 79 | immunophenotype                        | 0.03  | 0.019 |
| 80 | asthma                                 | 0.165 | 0.004 |
| 81 | lung disease                           | 0.649 | 0.1   |
| 82 | insomnia                               | 0.011 | 0.033 |
| 83 | anaplastic astrocytoma                 | 0.045 | 0.011 |
| 84 | AIDS dementia                          | 0.017 | 0.011 |
| 85 | nervous system disease                 | 0.85  | 0.218 |
| 86 | inflammatory bowel disease             | 0.059 | 0.063 |
| 87 | metastatic melanoma                    | 0.05  | 0.06  |
| 88 | Small for gestational age              | 0.01  | 0.028 |
| 89 | hepatocellular carcinoma               | 0.112 | 0.01  |

|     |                                         |       |       |
|-----|-----------------------------------------|-------|-------|
| 90  | heart disease                           | 0.283 | 0.077 |
| 91  | Ascites                                 | 0.051 | 0.011 |
| 92  | mental or behavioural disorder          | 0.331 | 0.177 |
| 93  | dysplasia                               | 0.029 | 0.011 |
| 94  | colon adenocarcinoma                    | 0.016 | 0.029 |
| 95  | nervousness                             | 0.066 | 0.064 |
| 96  | Myelitis                                | 0.017 | 0.011 |
| 97  | myocardial infarction                   | 0.024 | 0.049 |
| 98  | tropical spastic paraparesis            | 0.044 | 0.024 |
| 99  | anxiety disorder                        | 0.029 | 0.061 |
| 100 | chronic hepatitis C virus infection     | 0.079 | 0.013 |
| 101 | allergy                                 | 0.027 | 0.017 |
| 102 | lung cancer                             | 0.647 | 0.082 |
| 103 | necrosis                                | 0.064 | 0.019 |
| 104 | severe cutaneous adverse reaction       | 0.05  | 0.018 |
| 105 | systemic lupus erythematosus            | 0.099 | 0.087 |
| 106 | kidney injury                           | 0.01  | 0.011 |
| 107 | aspergillosis                           | 0.013 | 0.035 |
| 108 | obesity                                 | 0.198 | 0.063 |
| 109 | stomach neoplasm                        | 0.064 | 0.01  |
| 110 | hypoxia                                 | 0.046 | 0.084 |
| 111 | ovarian carcinoma                       | 0.697 | 0.059 |
| 112 | Alzheimer's disease                     | 0.044 | 0.067 |
| 113 | urethral intrinsic sphincter deficiency | 0.043 | 0.023 |
| 114 | acute myeloid leukemia                  | 0.035 | 0.063 |
| 115 | Encephalopathy                          | 0.024 | 0.04  |
| 116 | cognitive disorder                      | 0.284 | 0.176 |
| 117 | psoriatic arthritis                     | 0.036 | 0.017 |
| 118 | nervous system injury                   | 0.059 | 0.081 |
| 119 | fetal growth restriction                | 0.012 | 0.052 |
| 120 | Chronic granulomatous disease           | 0.011 | 0.006 |

|     |                                              |       |       |
|-----|----------------------------------------------|-------|-------|
| 121 | head injury                                  | 0.015 | 0.083 |
| 122 | encephalitis                                 | 0.058 | 0.046 |
| 123 | mood disorder                                | 0.083 | 0.102 |
| 124 | Myasthenia gravis                            | 0.035 | 0.011 |
| 125 | metastatic neoplasm                          | 0.05  | 0.06  |
| 126 | Retinoblastoma                               | 0.069 | 0.016 |
| 127 | infertility                                  | 0.078 | 0.062 |
| 128 | bacterial disease                            | 0.156 | 0.045 |
| 129 | neuropathy                                   | 0.346 | 0.19  |
| 130 | urinary bladder cancer                       | 0.048 | 0.01  |
| 131 | asphyxia neonatorum                          | 0.038 | 0.073 |
| 132 | inflammation                                 | 0.102 | 0.123 |
| 133 | cirrhosis of liver                           | 0.053 | 0.016 |
| 134 | vascular disease                             | 0.234 | 0.158 |
| 135 | migraine without aura                        | 0.018 | 0.039 |
| 136 | type I diabetes mellitus                     | 0.048 | 0.039 |
| 137 | peritonitis                                  | 0.038 | 0.011 |
| 138 | renal cell adenocarcinoma                    | 0.078 | 0.017 |
| 139 | cerebellar ataxia                            | 0.253 | 0.063 |
| 140 | heart failure                                | 0.015 | 0.047 |
| 141 | congenital heart disease                     | 0.013 | 0.049 |
| 142 | experimental autoimmune<br>encephalomyelitis | 0.113 | 0.015 |
| 143 | attention deficit hyperactivity disorder     | 0.01  | 0.058 |
| 144 | type IV hypersensitivity disease             | 0.235 | 0.025 |
| 145 | liver disease                                | 0.115 | 0.159 |
| 146 | chronic hepatitis                            | 0.046 | 0.012 |
| 147 | adenocarcinoma                               | 0.778 | 0.048 |
| 148 | edema                                        | 0.015 | 0.026 |
| 149 | schizophrenia                                | 0.01  | 0.168 |
| 150 | Hyperglycemia                                | 0.012 | 0.017 |

|     |                                         |       |       |
|-----|-----------------------------------------|-------|-------|
| 151 | infectious disease                      | 0.335 | 0.124 |
| 152 | migraine disorder                       | 0.052 | 0.062 |
| 153 | Myelopathy                              | 0.015 | 0.024 |
| 154 | relapsing-remitting multiple sclerosis  | 0.11  | 0.031 |
| 155 | breast cancer                           | 0.725 | 0.029 |
| 156 | Hypothermia                             | 0.046 | 0.079 |
| 157 | hemorrhage                              | 0.075 | 0.076 |
| 158 | viral encephalitis                      | 0.056 | 0.044 |
| 159 | Abnormality of mitochondrial metabolism | 0.011 | 0.018 |
| 160 | cerebral artery occlusion               | 0.024 | 0.044 |
| 161 | cancer                                  | 0.838 | 0.619 |
| 162 | celiac disease                          | 0.011 | 0.053 |
| 163 | neoplasm                                | 0.85  | 0.633 |
| 164 | Spinal cord injury                      | 0.052 | 0.043 |
| 165 | diabetes mellitus                       | 0.05  | 0.09  |
| 166 | osteosarcoma                            | 0.044 | 0.01  |
| 167 | vasculitis                              | 0.043 | 0.014 |
| 168 | Fanconi anemia complementation group E  | 0.014 | 0.026 |
| 169 | Herpetic encephalitis                   | 0.015 | 0.017 |
| 170 | neuromyelitis optica                    | 0.051 | 0.028 |
| 171 | medulloblastoma                         | 0.042 | 0.071 |
| 172 | Gliosis                                 | 0.017 | 0.078 |
| 173 | neuroblastoma                           | 0.082 | 0.047 |
| 174 | septic shock                            | 0.05  | 0.03  |
| 175 | pulmonary edema                         | 0.011 | 0.016 |
| 176 | psychotic symptoms                      | 0.01  | 0.039 |
| 177 | colitis                                 | 0.058 | 0.054 |
| 178 | transient ischemic attack               | 0.013 | 0.021 |
| 179 | Sarcoidosis                             | 0.079 | 0.02  |
| 180 | hepatitis C virus infection             | 0.079 | 0.029 |
| 181 | brain edema                             | 0.019 | 0.06  |

|     |                                |       |       |
|-----|--------------------------------|-------|-------|
| 182 | chronic kidney disease         | 0.004 | 0.037 |
| 183 | Uveal Melanoma                 | 0.037 | 0.033 |
| 184 | Ataxia-telangiectasia          | 0.031 | 0.05  |
| 185 | Cognitive impairment           | 0.025 | 0.062 |
| 186 | Vitiligo                       | 0.017 | 0.077 |
| 187 | osteoarthritis                 | 0.04  | 0.043 |
| 188 | injury                         | 0.116 | 0.144 |
| 189 | central nervous system disease | 0.85  | 0.214 |
| 190 | Nausea                         | 0.01  | 0.013 |
| 191 | Frontotemporal dementia        | 0.011 | 0.011 |
| 192 | Meningioma                     | 0.041 | 0.044 |
| 193 | respiratory failure            | 0.067 | 0.018 |
| 194 | Tuberous sclerosis             | 0.029 | 0.011 |
| 195 | encephalomyelitis              | 0.228 | 0.064 |
| 196 | Growth delay                   | 0.021 | 0.026 |
| 197 | Potassium-aggravated myotonia  | 0.044 | 0.018 |
| 198 | brain infarction               | 0.041 | 0.067 |
| 199 | Shock                          | 0.044 | 0.05  |
| 200 | Peripheral demyelination       | 0.058 | 0.027 |
| 201 | grade III glioma               | 0.03  | 0.01  |
| 202 | substance dependence           | 0.062 | 0.06  |
| 203 | Guillain-Barre syndrome        | 0.052 | 0.041 |
| 204 | psoriasis                      | 0.056 | 0.048 |
| 205 | cerebral infarction            | 0.04  | 0.067 |
| 206 | nicotine dependence            | 0.06  | 0.018 |
| 207 | Mental deterioration           | 0.015 | 0.034 |
| 208 | Seizure                        | 0.021 | 0.082 |
| 209 | ulcerative colitis             | 0.05  | 0.055 |
| 210 | osteonecrosis                  | 0.048 | 0.054 |
| 211 | diarrheal disease              | 0.035 | 0.014 |
| 212 | toxic encephalopathy           | 0.024 | 0.063 |

|     |                                        |       |       |
|-----|----------------------------------------|-------|-------|
| 213 | delirium                               | 0.01  | 0.147 |
| 214 | breast carcinoma                       | 0.709 | 0.062 |
| 215 | pain                                   | 0.06  | 0.064 |
| 216 | keratitis                              | 0.048 | 0.014 |
| 217 | chronic obstructive pulmonary disease  | 0.066 | 0.08  |
| 218 | astrocytoma                            | 0.676 | 0.036 |
| 219 | cardiac hypertrophy                    | 0.011 | 0.019 |
| 220 | Paroxysmal exertion-induced dyskinesia | 0.012 | 0.008 |
| 221 | dementia (disease)                     | 0.284 | 0.074 |
| 222 | Duchenne muscular dystrophy            | 0.033 | 0.013 |
| 223 | non-small cell lung adenocarcinoma     | 0.02  | 0.038 |
| 224 | polyneuropathy                         | 0.049 | 0.013 |
| 225 | subarachnoid hemorrhage                | 0.034 | 0.066 |

**Figure S1.** Multiple sequence alignment of human S100B, S100A1, S100A4, S100A6, and S100P proteins by Clustal Omega.

```

sp|P25815|S100P_HUMAN      -MTELETAMGMIIDVFSRYSGSEGSTQTLTKGELKVLMEKELPGFLQSGKDKDAVDKLLK      59
sp|P23297|S10A1_HUMAN      MGSELETAMETLINVFHAHSGKEGDKYKLSKKELKELLQTELSGFLDAQKDVAVDKVMK      60
sp|P26447|S10A4_HUMAN      MACPLEKALDVMVSTFHKYSGKEGDKFKLNKSELKELLTRELPSFLGKRTDEAAFQKLMS      60
sp|P06703|S10A6_HUMAN      MACPLDQAIGLLVAIFHKYSGREGDKHTLSKKELKELIQKELT--IGSKLQDAEIA RLME      58
sp|P04271|S100B_HUMAN      -MSELEKAMVALIDVFHQYSGREGDKHKLKKSELKELINNELSHFLEEIKEQEVDKVME      59
                               *: *:  ::  *  : ** **.. *. *  *** *:  **  :  :  .  :::.

sp|P25815|S100P_HUMAN      DLDANGDAQVDFSEFIVFVA AITSACHKYFEKAGLK-----          95
sp|P23297|S10A1_HUMAN      ELDENG DGEVDFQEYVVLVAALTVACNNFFWENS-----          94
sp|P26447|S10A4_HUMAN      NLDSNRDNEVDFQEYCVFLSCIAMMCNEFFEGFPDKQPRKK          101
sp|P06703|S10A6_HUMAN      DLDRNKDQEVNFQEYVTF LGALALIYNEALKG-----          90
sp|P04271|S100B_HUMAN      TLDNDGDGECDFQEFMAFVAMVTTACHEFFEHE-----          92
                               ** : * : :*. *: .::: ::  :: :

```

Percent Identity Matrix - created by Clustal2.1

|    |                       |        |        |        |        |        |
|----|-----------------------|--------|--------|--------|--------|--------|
| 1: | sp P25815 S100P_HUMAN | 100.00 | 52.69  | 41.05  | 34.83  | 50.00  |
| 2: | sp P23297 S10A1_HUMAN | 52.69  | 100.00 | 48.94  | 43.33  | 57.61  |
| 3: | sp P26447 S10A4_HUMAN | 41.05  | 48.94  | 100.00 | 51.11  | 45.65  |
| 4: | sp P06703 S10A6_HUMAN | 34.83  | 43.33  | 51.11  | 100.00 | 39.33  |
| 5: | sp P04271 S100B_HUMAN | 50.00  | 57.61  | 45.65  | 39.33  | 100.00 |
